# Supplementary material
Source: publisher figshare collection journal article supplement (https://springernature.figshare.com/ndownloader/files/17245724)
Supplement: Supplementary file [file 17245724]

Additional file 1: Table S1a: Correlation and path coefficients for direct and indirect effects of Na<sup>+</sup> concentration, K<sup>+</sup> concentration, survival, Na<sup>+</sup>-K<sup>+</sup> ratio, and shoot biomass on SES scores in an F<sub>2,3</sub> population of a cross between Capsule (salt tolerant) and BR29 (salt sensitive) grown under salt-stress at seedling stage.

| Predictor variables                   | Correlation | Direct effects (D) | Indirect effects (I)          |          |                              |                                       |                 | Total effects (D+I) |        |
|---------------------------------------|-------------|--------------------|-------------------------------|----------|------------------------------|---------------------------------------|-----------------|---------------------|--------|
|                                       |             |                    | Na <sup>+</sup> concentration | Survival | K <sup>+</sup> concentration | Na <sup>+</sup> -K <sup>+</sup> ratio | Biomass (Shoot) |                     |        |
| Na <sup>+</sup> concentration         | 0.692       | 0.116              |                               | 0.261    | 0.048                        | -0.004                                | 0.270           | 0.575               | 0.691  |
| Survival                              | -0.795      | -0.368             | 0.083                         |          | -0.052                       | 0.0036                                | -0.296          | -0.427              | -0.794 |
| K <sup>+</sup> concentration          | -0.184      | -0.122             | -0.112                        | 0.072    |                              | -0.151                                | 0.13            | -0.061              | -0.183 |
| Na <sup>+</sup> -K <sup>+</sup> ratio | 0.440       | 0.0085             | 0.051                         | 0.152    | 0.033                        |                                       | 0.191           | 0.427               | 0.436  |
| Biomass (Shoot)                       | -0.815      | -0.427             | -0.074                        | -0.255   | -0.063                       | 0.004                                 |                 | -0.388              | -0.815 |

Residual effects= 0.50

Additional file 1: Table S 1b: Correlation and path coefficients for direct and indirect effects of Na<sup>+</sup> concentration, survival and K<sup>+</sup> concentration on SES scores in an F<sub>2,3</sub> population of a cross between Capsule (salt tolerant) and BR29 (salt sensitive) grown under salt-stress at seedling stage.

| Predictor variables           | Correlation | Direct effects (D) | Indirect effects (I)          |          |                              | Total effects (D+I) |        |
|-------------------------------|-------------|--------------------|-------------------------------|----------|------------------------------|---------------------|--------|
|                               |             |                    | Na <sup>+</sup> concentration | Survival | K <sup>+</sup> concentration |                     |        |
| Na <sup>+</sup> concentration | 0.692       | 0.215              |                               | 0.387    | 0.089                        | 0.477               | 0.692  |
| Survival                      | -0.794      | -0.547             | -0.153                        |          | -0.095                       | -0.248              | -0.795 |
| K <sup>+</sup> concentration  | -0.184      | -0.139             | -0.125                        | 0.081    |                              | -0.044              | -0.183 |

Residual effect= 0.61
